# Supplementary material for: Identification of Gm15441, a Txnip antisense lncRNA, as a critical regulator in liver metabolic homeostasis
Source: Cell Biosci. 2021 Dec 14;11:208. doi: 10.1186/s13578-021-00722-1 (PMC8670210; doi:10.1186/s13578-021-00722-1)
Supplement: Supplementary file 4 — Additional file 4. The complete list of mRNAs highly correlated with Txnip and Gm15441. [file 13578_2021_722_MOESM4_ESM.xlsx]

## Sheet: Txnip positive correlation
GeneBank_ID	Official Gene Symbol	Species	Gene Name
NM_001110331	ECI2	Mus musculus	enoyl-Coenzyme A delta isomerase 2(Eci2)
NM_001110332	ECI2	Mus musculus	enoyl-Coenzyme A delta isomerase 2(Eci2)
NM_001170911	PRR13	Mus musculus	proline rich 13(Prr13)
NM_027855	ATRAID	Mus musculus	all-trans retinoic acid induced differentiation factor(Atraid)
NM_018743	GPAT4	Mus musculus	glycerol-3-phosphate acyltransferase 4(Gpat4)
NM_023377	STARD5	Mus musculus	StAR-related lipid transfer (START) domain containing 5(Stard5)
NM_152824	RBM17	Mus musculus	RNA binding motif protein 17(Rbm17)
NM_013692	KLF10	Mus musculus	Kruppel-like factor 10(Klf10)
NM_001146123	PSAP	Mus musculus	prosaposin(Psap)
NM_153515	AMMECR1L	Mus musculus	AMME chromosomal region gene 1-like(Ammecr1l)
NM_001035228	ST3GAL5	Mus musculus	ST3 beta-galactoside alpha-2,3-sialyltransferase 5(St3gal5)
NM_001146120	PSAP	Mus musculus	prosaposin(Psap)
NM_011787	AMFR	Mus musculus	autocrine motility factor receptor(Amfr)
NM_145602	NDRG4	Mus musculus	N-myc downstream regulated gene 4(Ndrg4)
NM_145569	MAT2A	Mus musculus	methionine adenosyltransferase II, alpha(Mat2a)
NM_007692	CHKB	Mus musculus	choline kinase beta(Chkb)
NM_001146121	PSAP	Mus musculus	prosaposin(Psap)
NM_009474	UOX	Mus musculus	urate oxidase(Uox)
NM_025287	spop	Mus musculus	speckle-type POZ protein(Spop)
NM_019823	Cyp2d22	Mus musculus	cytochrome P450, family 2, subfamily d, polypeptide 22(Cyp2d22)
NM_139295	MCFD2	Mus musculus	multiple coagulation factor deficiency 2(Mcfd2)
NM_028792	JOSD1	Mus musculus	Josephin domain containing 1(Josd1)
NM_008261	HNF4A	Mus musculus	hepatic nuclear factor 4, alpha(Hnf4a)
NM_009196	SLC16A1	Mus musculus	solute carrier family 16 (monocarboxylic acid transporters), member 1(Slc16a1)
NM_019826	IVD	Mus musculus	isovaleryl coenzyme A dehydrogenase(Ivd)
NM_008382	INHBE	Mus musculus	inhibin beta-E(Inhbe)
NM_001081119	ABHD13	Mus musculus	abhydrolase domain containing 13(Abhd13)
NM_001081379	ANKRD11	Mus musculus	ankyrin repeat domain 11(Ankrd11)
NM_022331	HERPUD1	Mus musculus	homocysteine-inducible, endoplasmic reticulum stress-inducible, ubiquitin-like domain member 1(Herpud1)
NM_001081372	Ces1b	Mus musculus	carboxylesterase 1B(Ces1b)
NM_007954	Ces1c	Mus musculus	carboxylesterase 1C(Ces1c)
NM_021525	RCL1	Mus musculus	RNA terminal phosphate cyclase-like 1(Rcl1)
NM_008256	HMGCS2	Mus musculus	3-hydroxy-3-methylglutaryl-Coenzyme A synthase 2(Hmgcs2)
NM_009744	BCL6	Mus musculus	B cell leukemia/lymphoma 6(Bcl6)
NM_008898	POR	Mus musculus	P450 (cytochrome) oxidoreductase(Por)
NM_010684	LAMP1	Mus musculus	lysosomal-associated membrane protein 1(Lamp1)
NM_201645	UGT1A1	Mus musculus	UDP glucuronosyltransferase 1 family, polypeptide A1(Ugt1a1)
NM_008136	GNL1	Mus musculus	guanine nucleotide binding protein-like 1(Gnl1)
NM_026267	NECAP1	Mus musculus	NECAP endocytosis associated 1(Necap1)
NM_025296	CIAO1	Mus musculus	cytosolic iron-sulfur protein assembly 1(Ciao1)
NM_023792	PANK1	Mus musculus	pantothenate kinase 1(Pank1)
NM_026385	PLLP	Mus musculus	plasma membrane proteolipid(Pllp)
NM_008098	MTPN	Mus musculus	myotrophin(Mtpn)
NM_028320	ADIPOR1	Mus musculus	adiponectin receptor 1(Adipor1)
NM_026384	DGAT2	Mus musculus	diacylglycerol O-acyltransferase 2(Dgat2)
NM_001199217	SLC38A3	Mus musculus	solute carrier family 38, member 3(Slc38a3)
NM_019419	ARL6IP1	Mus musculus	ADP-ribosylation factor-like 6 interacting protein 1(Arl6ip1)
NM_011933	DECR2	Mus musculus	2-4-dienoyl-Coenzyme A reductase 2, peroxisomal(Decr2)
NM_022026	AQP9	Mus musculus	aquaporin 9(Aqp9)
NM_020520	SLC25A20	Mus musculus	solute carrier family 25 (mitochondrial carnitine/acylcarnitine translocase), member 20(Slc25a20)
NM_007907	EEF2	Mus musculus	eukaryotic translation elongation factor 2(Eef2)
NM_016741	SCARB1	Mus musculus	scavenger receptor class B, member 1(Scarb1)
NM_021299	AK3	Mus musculus	adenylate kinase 3(Ak3)
NM_172257	SIDT2	Mus musculus	SID1 transmembrane family, member 2(Sidt2)
NM_173864	C1s2	Mus musculus	complement component 1, s subcomponent 2(C1s2)
NM_133249	PPARGC1B	Mus musculus	peroxisome proliferative activated receptor, gamma, coactivator 1 beta(Ppargc1b)
NM_009654	ALB	Mus musculus	albumin(Alb)
NM_001102455	APLP2	Mus musculus	amyloid beta (A4) precursor-like protein 2(Aplp2)
NM_009536	YWHAE	Mus musculus	tyrosine 3-monooxygenase/tryptophan 5-monooxygenase activation protein, epsilon polypeptide(Ywhae)
NM_013864	NDRG2	Mus musculus	N-myc downstream regulated gene 2(Ndrg2)
NM_001166591	EIF5A	Mus musculus	eukaryotic translation initiation factor 5A(Eif5a)
NM_011044	PCK1	Mus musculus	phosphoenolpyruvate carboxykinase 1, cytosolic(Pck1)
NM_008720	NPC1	Mus musculus	Niemann-Pick type C1(Npc1)
NM_007597	CANX	Mus musculus	calnexin(Canx)
NM_013464	AHR	Mus musculus	aryl-hydrocarbon receptor(Ahr)
NM_008202	SLC39A7	Mus musculus	solute carrier family 39 (zinc transporter), member 7(Slc39a7)
NM_001164608	MAF1	Mus musculus	MAF1 homolog, negative regulator of RNA polymerase III(Maf1)
NM_008281	HPN	Mus musculus	hepsin(Hpn)
NM_001177572	SLC25A13	Mus musculus	solute carrier family 25 (mitochondrial carrier, adenine nucleotide translocator), member 13(Slc25a13)
NM_028132	PGM2	Mus musculus	phosphoglucomutase 2(Pgm2)
NM_021345	HACD3	Mus musculus	3-hydroxyacyl-CoA dehydratase 3(Hacd3)
NM_028814	2810403A07Rik	Mus musculus	RIKEN cDNA 2810403A07 gene(2810403A07Rik)
NM_019688	RAPGEF4	Mus musculus	Rap guanine nucleotide exchange factor (GEF) 4(Rapgef4)
NM_001009949	SLC25A51	Mus musculus	solute carrier family 25, member 51(Slc25a51)
NM_080635	EIF3H	Mus musculus	eukaryotic translation initiation factor 3, subunit H(Eif3h)
NM_153529	NRN1	Mus musculus	neuritin 1(Nrn1)
NM_001163472	Cyp2d22	Mus musculus	cytochrome P450, family 2, subfamily d, polypeptide 22(Cyp2d22)
NM_001017966	DDI2	Mus musculus	DNA-damage inducible protein 2(Ddi2)
NM_133653	MAT1A	Mus musculus	methionine adenosyltransferase I, alpha(Mat1a)
NM_172703	EIF4G3	Mus musculus	eukaryotic translation initiation factor 4 gamma, 3(Eif4g3)
NM_001012310	SLC25A47	Mus musculus	solute carrier family 25, member 47(Slc25a47)
NM_007981	ACSL1	Mus musculus	acyl-CoA synthetase long-chain family member 1(Acsl1)
NM_144821	Mfsd4b1	Mus musculus	major facilitator superfamily domain containing 4B1(Mfsd4b1)
NM_008156	GPLD1	Mus musculus	glycosylphosphatidylinositol specific phospholipase D1(Gpld1)
NM_011678	USP4	Mus musculus	ubiquitin specific peptidase 4 (proto-oncogene)(Usp4)
NM_008551	MAPKAPK2	Mus musculus	MAP kinase-activated protein kinase 2(Mapkapk2)
NM_008672	NAP1L4	Mus musculus	nucleosome assembly protein 1-like 4(Nap1l4)
NM_010220	FKBP5	Mus musculus	FK506 binding protein 5(Fkbp5)
NM_011396	slc22a5	Mus musculus	solute carrier family 22 (organic cation transporter), member 5(Slc22a5)
NM_008676	NBR1	Mus musculus	neighbor of Brca1 gene 1(Nbr1)
NM_001171003	MGAM	Mus musculus	maltase-glucoamylase(Mgam)
NM_176073	CPQ	Mus musculus	carboxypeptidase Q(Cpq)
NM_028780	TM9SF1	Mus musculus	transmembrane 9 superfamily member 1(Tm9sf1)
NM_001005863	MTUS1	Mus musculus	mitochondrial tumor suppressor 1(Mtus1)
NM_001110252	HPN	Mus musculus	hepsin(Hpn)
NM_023732	ABCB6	Mus musculus	ATP-binding cassette, sub-family B (MDR/TAP), member 6(Abcb6)
NM_027935	TMEM50A	Mus musculus	transmembrane protein 50A(Tmem50a)
NM_019993	ALDH9A1	Mus musculus	aldehyde dehydrogenase 9, subfamily A1(Aldh9a1)
NM_020588	TMEM183A	Mus musculus	transmembrane protein 183A(Tmem183a)
NM_020581	ANGPTL4	Mus musculus	angiopoietin-like 4(Angptl4)
NM_019996	PHAX	Mus musculus	phosphorylated adaptor for RNA export(Phax)
NM_001110499	CANX	Mus musculus	calnexin(Canx)
NM_025356	UBE2D3	Mus musculus	ubiquitin-conjugating enzyme E2D 3(Ube2d3)
NM_181582	EIF5A	Mus musculus	eukaryotic translation initiation factor 5A(Eif5a)
NM_013493	CNBP	Mus musculus	cellular nucleic acid binding protein(Cnbp)
NM_001110809	GPATCH4	Mus musculus	G patch domain containing 4(Gpatch4)
NM_001042485	TMEM183A	Mus musculus	transmembrane protein 183A(Tmem183a)
NM_145367	TXNDC5	Mus musculus	thioredoxin domain containing 5(Txndc5)
NM_010497	idh1	Mus musculus	isocitrate dehydrogenase 1 (NADP+), soluble(Idh1)
NM_001042484	GOLGA7	Mus musculus	golgi autoantigen, golgin subfamily a, 7(Golga7)
NM_146214	TAT	Mus musculus	tyrosine aminotransferase(Tat)
NM_145365	CREB3L3	Mus musculus	cAMP responsive element binding protein 3-like 3(Creb3l3)
NM_001168230	MORF4L2	Mus musculus	mortality factor 4 like 2(Morf4l2)
NM_029600	ABCC3	Mus musculus	ATP-binding cassette, sub-family C (CFTR/MRP), member 3(Abcc3)
NM_009159	SRSF5	Mus musculus	serine/arginine-rich splicing factor 5(Srsf5)
NM_008061	G6PC	Mus musculus	glucose-6-phosphatase, catalytic(G6pc)
NM_026178	MMD	Mus musculus	monocyte to macrophage differentiation-associated(Mmd)
NM_008060	GANAB	Mus musculus	alpha glucosidase 2 alpha neutral subunit(Ganab)
NM_023184	KLF15	Mus musculus	Kruppel-like factor 15(Klf15)
NM_013806	ABCC2	Mus musculus	ATP-binding cassette, sub-family C (CFTR/MRP), member 2(Abcc2)
NM_010936	NR1I2	Mus musculus	nuclear receptor subfamily 1, group I, member 2(Nr1i2)
NM_175194	SLC25A16	Mus musculus	solute carrier family 25 (mitochondrial carrier, Graves disease autoantigen), member 16(Slc25a16)
NM_011868	ECI2	Mus musculus	enoyl-Coenzyme A delta isomerase 2(Eci2)
NM_008063	SLC37A4	Mus musculus	solute carrier family 37 (glucose-6-phosphate transporter), member 4(Slc37a4)
NM_021564	FETUB	Mus musculus	fetuin beta(Fetub)
NM_001077510	GNAS	Mus musculus	GNAS (guanine nucleotide binding protein, alpha stimulating) complex locus(Gnas)
NM_012032	SERINC3	Mus musculus	serine incorporator 3(Serinc3)
NM_007757	CPOX	Mus musculus	coproporphyrinogen oxidase(Cpox)
NM_007998	FECH	Mus musculus	ferrochelatase(Fech)
NM_138600	ALDH7A1	Mus musculus	aldehyde dehydrogenase family 7, member A1(Aldh7a1)
NM_172647	F11R	Mus musculus	F11 receptor(F11r)
NM_010764	MAN2B1	Mus musculus	mannosidase 2, alpha B1(Man2b1)
NM_008453	KLF3	Mus musculus	Kruppel-like factor 3 (basic)(Klf3)
NM_031884	ABCG5	Mus musculus	ATP-binding cassette, sub-family G (WHITE), member 5(Abcg5)
NM_001177804	SIRT3	Mus musculus	sirtuin 3(Sirt3)
NM_054102	IVNS1ABP	Mus musculus	influenza virus NS1A binding protein(Ivns1abp)
NM_010007	Cyp2j5	Mus musculus	cytochrome P450, family 2, subfamily j, polypeptide 5(Cyp2j5)
NM_001171026	OS9	Mus musculus	amplified in osteosarcoma(Os9)
NM_001163689	PNPLA2	Mus musculus	patatin-like phospholipase domain containing 2(Pnpla2)
NM_174870	SLC26A1	Mus musculus	solute carrier family 26 (sulfate transporter), member 1(Slc26a1)
NM_172691	FAM214B	Mus musculus	family with sequence similarity 214, member B(Fam214b)
NM_025976	BFAR	Mus musculus	bifunctional apoptosis regulator(Bfar)
NM_026669	TMBIM6	Mus musculus	transmembrane BAX inhibitor motif containing 6(Tmbim6)
NM_133969	Cyp4v3	Mus musculus	cytochrome P450, family 4, subfamily v, polypeptide 3(Cyp4v3)
NM_025459	fam134b	Mus musculus	family with sequence similarity 134, member B(Fam134b)
NM_027115	Mapk1ip1	Mus musculus	mitogen-activated protein kinase 1 interacting protein 1(Mapk1ip1)
NM_008913	PPP3CA	Mus musculus	protein phosphatase 3, catalytic subunit, alpha isoform(Ppp3ca)
NM_010284	GHR	Mus musculus	growth hormone receptor(Ghr)
NM_023719	TXNIP	Mus musculus	thioredoxin interacting protein(Txnip)
NM_008877	PLG	Mus musculus	plasminogen(Plg)
NM_027918	1300017J02Rik	Mus musculus	RIKEN cDNA 1300017J02 gene(1300017J02Rik)
NM_026947	Eci3	Mus musculus	enoyl-Coenzyme A delta isomerase 3(Eci3)
NM_001177812	WBP1L	Mus musculus	WW domain binding protein 1 like(Wbp1l)
NM_008244	HGS	Mus musculus	HGF-regulated tyrosine kinase substrate(Hgs)
NM_015729	ACOX1	Mus musculus	acyl-Coenzyme A oxidase 1, palmitoyl(Acox1)
NM_145542	AHCYL1	Mus musculus	S-adenosylhomocysteine hydrolase-like 1(Ahcyl1)
NM_011363	SH2B1	Mus musculus	SH2B adaptor protein 1(Sh2b1)
NM_010956	OGDH	Mus musculus	oxoglutarate (alpha-ketoglutarate) dehydrogenase (lipoamide)(Ogdh)
NM_177470	ACAA2	Mus musculus	acetyl-Coenzyme A acyltransferase 2 (mitochondrial 3-oxoacyl-Coenzyme A thiolase)(Acaa2)
NM_023281	SDHA	Mus musculus	succinate dehydrogenase complex, subunit A, flavoprotein (Fp)(Sdha)
NM_007819	Cyp3a13	Mus musculus	cytochrome P450, family 3, subfamily a, polypeptide 13(Cyp3a13)
NM_019760	SERINC1	Mus musculus	serine incorporator 1(Serinc1)
NM_198292	TEX2	Mus musculus	testis expressed gene 2(Tex2)
NM_010271	GPD1	Mus musculus	glycerol-3-phosphate dehydrogenase 1 (soluble)(Gpd1)
NM_011082	PIGR	Mus musculus	polymeric immunoglobulin receptor(Pigr)
NM_020578	EHD3	Mus musculus	EH-domain containing 3(Ehd3)
NM_009318	TAPBP	Mus musculus	TAP binding protein(Tapbp)
NM_001164885	LPIN2	Mus musculus	lipin 2(Lpin2)
NM_001024606	PDP2	Mus musculus	pyruvate dehyrogenase phosphatase catalytic subunit 2(Pdp2)
NM_013777	Akr1c12	Mus musculus	aldo-keto reductase family 1, member C12(Akr1c12)
NM_008231	HDGF	Mus musculus	hepatoma-derived growth factor(Hdgf)
NM_146126	SORD	Mus musculus	sorbitol dehydrogenase(Sord)
NM_009444	TGOLN2	Mus musculus	trans-golgi network protein 2(Tgoln2)
NM_010707	Lgals6	Mus musculus	lectin, galactose binding, soluble 6(Lgals6)
NM_024264	CYP27A1	Mus musculus	cytochrome P450, family 27, subfamily a, polypeptide 1(Cyp27a1)
NM_145959	FAM91A1	Mus musculus	family with sequence similarity 91, member A1(Fam91a1)
NM_144900	ATP1A1	Mus musculus	ATPase, Na+/K+ transporting, alpha 1 polypeptide(Atp1a1)
NM_009041	RDX	Mus musculus	radixin(Rdx)

## Sheet: Gm15441 negative correlation
GeneBank_ID	Official Gene Symbol	Species	Gene Name
NM_001080797	G3BP2	Mus musculus	GTPase activating protein (SH3 domain) binding protein 2(G3bp2)
NM_177683	VGLL4	Mus musculus	vestigial like family member 4(Vgll4)
NM_181821	HCFC1R1	Mus musculus	host cell factor C1 regulator 1 (XPO1-dependent)(Hcfc1r1)
NM_001012625	RIMS1	Mus musculus	regulating synaptic membrane exocytosis 1(Rims1)
NM_001111029	Zfp661	Mus musculus	zinc finger protein 661(Zfp661)
NM_028303	PDZD11	Mus musculus	PDZ domain containing 11(Pdzd11)
NM_001150749	Rdh7	Mus musculus	retinol dehydrogenase 7(Rdh7)
NM_001161768	GALNT6	Mus musculus	UDP-N-acetyl-alpha-D-galactosamine:polypeptide N-acetylgalactosaminyltransferase 6(Galnt6)
NM_007844	DEFA29	Mus musculus	defensin, alpha, 29(Defa29)
NM_001033442	Gm1604b	Mus musculus	predicted gene 1604b(Gm1604b)
NM_178417	Zfp867	Mus musculus	zinc finger protein 867(Zfp867)
NM_007606	Car3	Mus musculus	carbonic anhydrase 3(Car3)
NM_145965	GPHN	Mus musculus	gephyrin(Gphn)
NM_001045554	WFDC15B	Mus musculus	WAP four-disulfide core domain 15B(Wfdc15b)
NM_146931	Olfr796	Mus musculus	olfactory receptor 796(Olfr796)
NM_001102437	ACBD5	Mus musculus	acyl-Coenzyme A binding domain containing 5(Acbd5)
NM_001101588	Cyp4f40	Mus musculus	cytochrome P450, family 4, subfamily f, polypeptide 40(Cyp4f40)
NM_001093752	SRSF11	Mus musculus	serine/arginine-rich splicing factor 11(Srsf11)
NM_144870	NDUFS8	Mus musculus	NADH dehydrogenase (ubiquinone) Fe-S protein 8(Ndufs8)
NM_019945	MAST1	Mus musculus	microtubule associated serine/threonine kinase 1(Mast1)
NM_026498	MRPS11	Mus musculus	mitochondrial ribosomal protein S11(Mrps11)
NM_144519	Zfp639	Mus musculus	zinc finger protein 639(Zfp639)
NM_026374	ILF2	Mus musculus	interleukin enhancer binding factor 2(Ilf2)
NM_027585	CNBD2	Mus musculus	cyclic nucleotide binding domain containing 2(Cnbd2)
NM_001007154	PHACTR3	Mus musculus	phosphatase and actin regulator 3(Phactr3)
NM_199467	MMS22L	Mus musculus	MMS22-like, DNA repair protein(Mms22l)
NM_019829	stx5a	Mus musculus	syntaxin 5A(Stx5a)
NM_198013	CUEDC1	Mus musculus	CUE domain containing 1(Cuedc1)
NM_024192	CUEDC2	Mus musculus	CUE domain containing 2(Cuedc2)
NM_017406	ATF6B	Mus musculus	activating transcription factor 6 beta(Atf6b)
NM_175152	THAP3	Mus musculus	THAP domain containing, apoptosis associated protein 3(Thap3)
NM_001045558	PICK1	Mus musculus	protein interacting with C kinase 1(Pick1)
NM_001111142	LRRC73	Mus musculus	leucine rich repeat containing 73(Lrrc73)
NM_025282	MEF2C	Mus musculus	myocyte enhancer factor 2C(Mef2c)
NM_001081413	UNC13B	Mus musculus	unc-13 homolog B (C. elegans)(Unc13b)
NM_001033337	TTC38	Mus musculus	tetratricopeptide repeat domain 38(Ttc38)
NM_001099288	ARHGAP44	Mus musculus	Rho GTPase activating protein 44(Arhgap44)
NM_145980	8430408G22Rik	Mus musculus	RIKEN cDNA 8430408G22 gene(8430408G22Rik)
NM_001011760	Olfr314	Mus musculus	olfactory receptor 314(Olfr314)
NM_008800	pde1b	Mus musculus	phosphodiesterase 1B, Ca2+-calmodulin dependent(Pde1b)
NM_008807	TULP2	Mus musculus	tubby-like protein 2(Tulp2)
NM_001101450	Gm44	Mus musculus	predicted gene 44(Gm44)
NM_008930	Prl7a1	Mus musculus	prolactin family 7, subfamily a, member 1(Prl7a1)
NM_001161628	EFCAB6	Mus musculus	EF-hand calcium binding domain 6(Efcab6)
NM_029412	Egfem1	Mus musculus	EGF-like and EMI domain containing 1(Egfem1)
NM_201646	BTBD6	Mus musculus	BTB (POZ) domain containing 6(Btbd6)
NM_029897	C2CD5	Mus musculus	C2 calcium-dependent domain containing 5(C2cd5)
NM_019817	COPZ1	Mus musculus	coatomer protein complex, subunit zeta 1(Copz1)
NM_025294	natd1	Mus musculus	N-acetyltransferase domain containing 1(Natd1)
NM_001083922	WBP1	Mus musculus	WW domain binding protein 1(Wbp1)
NM_001083921	RBCK1	Mus musculus	RanBP-type and C3HC4-type zinc finger containing 1(Rbck1)
NM_028407	CCSER2	Mus musculus	coiled-coil serine rich 2(Ccser2)
NM_028528	BPIFA3	Mus musculus	BPI fold containing family A, member 3(Bpifa3)
NM_173066	EP400	Mus musculus	E1A binding protein p400(Ep400)
NM_019974	KLK11	Mus musculus	kallikrein related-peptidase 11(Klk11)
NM_010919	NKX2-2	Mus musculus	NK2 homeobox 2(Nkx2-2)
NM_001011518	Olfr94	Mus musculus	olfactory receptor 94(Olfr94)
NM_007989	FOXH1	Mus musculus	forkhead box H1(Foxh1)
NM_029975	ULBP1	Mus musculus	UL16 binding protein 1(Ulbp1)
NM_029733	2010005H15Rik	Mus musculus	RIKEN cDNA 2010005H15 gene(2010005H15Rik)
NM_001161746	TNFRSF12A	Mus musculus	tumor necrosis factor receptor superfamily, member 12a(Tnfrsf12a)
NM_007504	ATP2A1	Mus musculus	ATPase, Ca++ transporting, cardiac muscle, fast twitch 1(Atp2a1)
NM_052992	FXYD1	Mus musculus	FXYD domain-containing ion transport regulator 1(Fxyd1)
NM_007744	COMT	Mus musculus	catechol-O-methyltransferase(Comt)
NM_178637	KAT5	Mus musculus	K(lysine) acetyltransferase 5(Kat5)
NM_052991	FXYD1	Mus musculus	FXYD domain-containing ion transport regulator 1(Fxyd1)
NM_001100394	4930505A04Rik	Mus musculus	RIKEN cDNA 4930505A04 gene(4930505A04Rik)
NM_001033345	CATIP	Mus musculus	ciliogenesis associated TTC17 interacting protein(Catip)
NM_029617	KNL1	Mus musculus	kinetochore scaffold 1(Knl1)
NM_007508	ATP6V1A	Mus musculus	ATPase, H+ transporting, lysosomal V1 subunit A(Atp6v1a)
NM_145746	ODF4	Mus musculus	outer dense fiber of sperm tails 4(Odf4)
NM_001168371	USP19	Mus musculus	ubiquitin specific peptidase 19(Usp19)
NM_145502	ERLIN1	Mus musculus	ER lipid raft associated 1(Erlin1)
NM_144897	apoa1bp	Mus musculus	apolipoprotein A-I binding protein(Apoa1bp)
NM_145621	CAMKV	Mus musculus	CaM kinase-like vesicle-associated(Camkv)
NM_145500	UBTD1	Mus musculus	ubiquitin domain containing 1(Ubtd1)
NM_146952	Olfr522	Mus musculus	olfactory receptor 522(Olfr522)
NM_008600	MIP	Mus musculus	major intrinsic protein of lens fiber(Mip)
NM_001160406	GFI1B	Mus musculus	growth factor independent 1B(Gfi1b)
NM_144893	SLC35C2	Mus musculus	solute carrier family 35, member C2(Slc35c2)
NM_001168372	USP19	Mus musculus	ubiquitin specific peptidase 19(Usp19)
NM_146950	Olfr341	Mus musculus	olfactory receptor 341(Olfr341)
NM_133770	COQ8B	Mus musculus	coenzyme Q8B(Coq8b)
NM_027322	PRRG1	Mus musculus	proline rich Gla (G-carboxyglutamic acid) 1(Prrg1)
NM_025387	TMEM14C	Mus musculus	transmembrane protein 14C(Tmem14c)
NM_028532	TEPP	Mus musculus	testis, prostate and placenta expressed(Tepp)
NM_025385	PRR13	Mus musculus	proline rich 13(Prr13)
NM_028651	TMTC4	Mus musculus	transmembrane and tetratricopeptide repeat containing 4(Tmtc4)
NM_024176	DRAP1	Mus musculus	Dr1 associated protein 1 (negative cofactor 2 alpha)(Drap1)
NM_001159301	lgals9	Mus musculus	lectin, galactose binding, soluble 9(Lgals9)
NM_146959	Olfr631	Mus musculus	olfactory receptor 631(Olfr631)
NM_178401	RAMP1	Mus musculus	receptor (calcitonin) activity modifying protein 1(Ramp1)
NM_026239	TMEM35A	Mus musculus	transmembrane protein 35A(Tmem35a)
NM_019722	ARL2	Mus musculus	ADP-ribosylation factor-like 2(Arl2)
NM_175256	HEG1	Mus musculus	heart development protein with EGF-like domains 1(Heg1)
NM_001011869	Olfr452	Mus musculus	olfactory receptor 452(Olfr452)
NM_145760	ARFGAP1	Mus musculus	ADP-ribosylation factor GTPase activating protein 1(Arfgap1)
NM_001169577	UBE2H	Mus musculus	ubiquitin-conjugating enzyme E2H(Ube2h)
NM_007977	F8	Mus musculus	coagulation factor VIII(F8)
NM_001168244	SYCE2	Mus musculus	synaptonemal complex central element protein 2(Syce2)
NM_133895	SLC15A4	Mus musculus	solute carrier family 15, member 4(Slc15a4)
NM_001036740	B3GNT8	Mus musculus	UDP-GlcNAc:betaGal beta-1,3-N-acetylglucosaminyltransferase 8(B3gnt8)
NM_008701	Nkx2-9	Mus musculus	NK2 homeobox 9(Nkx2-9)
NM_029748	TMEM234	Mus musculus	transmembrane protein 234(Tmem234)
NM_001033598	ACSL6	Mus musculus	acyl-CoA synthetase long-chain family member 6(Acsl6)
NM_001177901	Zfp513	Mus musculus	zinc finger protein 513(Zfp513)
NM_145634	CD300LF	Mus musculus	CD300 molecule like family member F(Cd300lf)
NM_145996	ARID5A	Mus musculus	AT rich interactive domain 5A (MRF1-like)(Arid5a)
NM_144785	Slc22a19	Mus musculus	solute carrier family 22 (organic anion transporter), member 19(Slc22a19)
NM_001159419	SIDT1	Mus musculus	SID1 transmembrane family, member 1(Sidt1)
NM_146600	Olfr700	Mus musculus	olfactory receptor 700(Olfr700)
NM_001204201	SPP1	Mus musculus	secreted phosphoprotein 1(Spp1)
NM_026486	TCTN2	Mus musculus	tectonic family member 2(Tctn2)
NM_027334	Mettl7a1	Mus musculus	methyltransferase like 7A1(Mettl7a1)
NM_001159658	Aqp12	Mus musculus	aquaporin 12(Aqp12)
NM_198003	Zfp946	Mus musculus	zinc finger protein 946(Zfp946)
NM_198001	1110008P14Rik	Mus musculus	RIKEN cDNA 1110008P14 gene(1110008P14Rik)
NM_001198823	APP	Mus musculus	amyloid beta (A4) precursor protein(App)
NM_001080777	1700029F12Rik	Mus musculus	RIKEN cDNA 1700029F12 gene(1700029F12Rik)
NM_001113330	CRX	Mus musculus	cone-rod homeobox(Crx)
NM_001082536	MKL1	Mus musculus	MKL (megakaryoblastic leukemia)/myocardin-like 1(Mkl1)
NM_001082412	SLC25A53	Mus musculus	solute carrier family 25, member 53(Slc25a53)
NM_015790	Icosl	Mus musculus	icos ligand(Icosl)
NM_007928	MARK2	Mus musculus	MAP/microtubule affinity regulating kinase 2(Mark2)
NM_007807	CYBB	Mus musculus	cytochrome b-245, beta polypeptide(Cybb)
NM_001081322	MYO5C	Mus musculus	myosin VC(Myo5c)
NM_001082532	Pigyl	Mus musculus	phosphatidylinositol glycan anchor biosynthesis, class Y-like(Pigyl)
NM_028624	1110017D15Rik	Mus musculus	RIKEN cDNA 1110017D15 gene(1110017D15Rik)
NM_026686	METTL26	Mus musculus	methyltransferase like 26(Mettl26)
NM_001081320	CYB561D1	Mus musculus	cytochrome b-561 domain containing 1(Cyb561d1)
NM_015795	FBXO16	Mus musculus	F-box protein 16(Fbxo16)
NM_026203	AHI1	Mus musculus	Abelson helper integration site 1(Ahi1)
NM_001161724	ILK	Mus musculus	integrin linked kinase(Ilk)
NM_001172100	RNH1	Mus musculus	ribonuclease/angiogenin inhibitor 1(Rnh1)
NM_016757	WBP1	Mus musculus	WW domain binding protein 1(Wbp1)
NM_001081213	ERMP1	Mus musculus	endoplasmic reticulum metallopeptidase 1(Ermp1)
NM_177772	BPIFC	Mus musculus	BPI fold containing family C(Bpifc)
NM_001081695	DNMT3L	Mus musculus	DNA (cytosine-5-)-methyltransferase 3-like(Dnmt3l)
NM_001081212	IRS2	Mus musculus	insulin receptor substrate 2(Irs2)
NM_213659	STAT3	Mus musculus	signal transducer and activator of transcription 3(Stat3)
NM_177655	CSTL1	Mus musculus	cystatin-like 1(Cstl1)
NM_001110009	apoc1	Mus musculus	apolipoprotein C-I(Apoc1)
NM_001172475	SPHK1	Mus musculus	sphingosine kinase 1(Sphk1)
NM_001198841	CSRP3	Mus musculus	cysteine and glycine-rich protein 3(Csrp3)
NM_001159518	IGFBP7	Mus musculus	insulin-like growth factor binding protein 7(Igfbp7)
NM_018800	SYT6	Mus musculus	synaptotagmin VI(Syt6)
NM_146909	Olfr51	Mus musculus	olfactory receptor 51(Olfr51)
NM_018802	syt8	Mus musculus	synaptotagmin VIII(Syt8)
NM_199314	SERPINA11	Mus musculus	serine (or cysteine) peptidase inhibitor, clade A (alpha-1 antiproteinase, antitrypsin), member 11(Serpina11)
NM_001100449	TAF4B	Mus musculus	TATA-box binding protein associated factor 4b(Taf4b)
NM_025371	ACY1	Mus musculus	aminoacylase 1(Acy1)
NM_001104926	Cyp2j7	Mus musculus	cytochrome P450, family 2, subfamily j, polypeptide 7(Cyp2j7)
NM_026308	RPP21	Mus musculus	ribonuclease P 21 subunit(Rpp21)
NM_173384	SOX30	Mus musculus	SRY (sex determining region Y)-box 30(Sox30)
NM_025337	Akr7a5	Mus musculus	aldo-keto reductase family 7, member A5 (aflatoxin aldehyde reductase)(Akr7a5)
NM_001037749	SLC22A14	Mus musculus	solute carrier family 22 (organic cation transporter), member 14(Slc22a14)
NM_001112698	NGF	Mus musculus	nerve growth factor(Ngf)
NM_026301	RNF125	Mus musculus	ring finger protein 125(Rnf125)
NM_016663	syt3	Mus musculus	synaptotagmin III(Syt3)
NM_001113548	ADAMTSL5	Mus musculus	ADAMTS-like 5(Adamtsl5)
NM_001033266	Gm525	Mus musculus	predicted gene 525(Gm525)
NM_007947	LCN5	Mus musculus	lipocalin 5(Lcn5)
NM_130458	SP7	Mus musculus	Sp7 transcription factor 7(Sp7)
NM_029938	H2AFV	Mus musculus	H2A histone family, member V(H2afv)
NM_145943	SDE2	Mus musculus	SDE2 telomere maintenance homolog (S. pombe)(Sde2)
NM_001161818	Zfp639	Mus musculus	zinc finger protein 639(Zfp639)
NM_001199960	Ccl27b	Mus musculus	chemokine (C-C motif) ligand 27b(Ccl27b)
NM_011089	Pira2	Mus musculus	paired-Ig-like receptor A2(Pira2)
NM_145949	IDO2	Mus musculus	indoleamine 2,3-dioxygenase 2(Ido2)
NM_001198877	DYNC1I2	Mus musculus	dynein cytoplasmic 1 intermediate chain 2(Dync1i2)
NM_001198635	MAP7	Mus musculus	microtubule-associated protein 7(Map7)
NM_139272	GALNT2	Mus musculus	UDP-N-acetyl-alpha-D-galactosamine:polypeptide N-acetylgalactosaminyltransferase 2(Galnt2)
NM_001198878	DYNC1I2	Mus musculus	dynein cytoplasmic 1 intermediate chain 2(Dync1i2)
NM_146914	Olfr5	Mus musculus	olfactory receptor 5(Olfr5)
NM_145946	FANCI	Mus musculus	Fanconi anemia, complementation group I(Fanci)
NM_133857	USP53	Mus musculus	ubiquitin specific peptidase 53(Usp53)
NM_177873	HFM1	Mus musculus	HFM1, ATP-dependent DNA helicase homolog(Hfm1)
NM_027406	ALDH1L1	Mus musculus	aldehyde dehydrogenase 1 family, member L1(Aldh1l1)
NM_052823	fxyd2	Mus musculus	FXYD domain-containing ion transport regulator 2(Fxyd2)
NM_028615	DPPA2	Mus musculus	developmental pluripotency associated 2(Dppa2)
NM_025347	YPEL3	Mus musculus	yippee-like 3 (Drosophila)(Ypel3)
NM_001004293	AMIGO1	Mus musculus	adhesion molecule with Ig like domain 1(Amigo1)
NM_008902	ENDOU	Mus musculus	endonuclease, polyU-specific(Endou)
NM_011087	Pira1	Mus musculus	paired-Ig-like receptor A1(Pira1)
NM_178726	PPM1L	Mus musculus	protein phosphatase 1 (formerly 2C)-like(Ppm1l)
NM_080837	MYDGF	Mus musculus	myeloid derived growth factor(Mydgf)
NM_001166029	CFAP74	Mus musculus	cilia and flagella associated protein 74(Cfap74)
NM_178608	REEP1	Mus musculus	receptor accessory protein 1(Reep1)
NM_001166380	ARMCX1	Mus musculus	armadillo repeat containing, X-linked 1(Armcx1)
NM_001167592	PATE3	Mus musculus	prostate and testis expressed 3(Pate3)
NM_012048	POLK	Mus musculus	polymerase (DNA directed), kappa(Polk)
NM_001177707	ARFGAP1	Mus musculus	ADP-ribosylation factor GTPase activating protein 1(Arfgap1)
NM_011198	PTGS2	Mus musculus	prostaglandin-endoperoxide synthase 2(Ptgs2)
NM_001198860	CTBP1	Mus musculus	C-terminal binding protein 1(Ctbp1)
NM_016764	PRDX4	Mus musculus	peroxiredoxin 4(Prdx4)
NM_146809	Olfr1426	Mus musculus	olfactory receptor 1426(Olfr1426)
NM_212473	FAM53B	Mus musculus	family with sequence similarity 53, member B(Fam53b)
NM_023172	NDUFB9	Mus musculus	NADH dehydrogenase (ubiquinone) 1 beta subcomplex, 9(Ndufb9)
NM_024227	MRPL28	Mus musculus	mitochondrial ribosomal protein L28(Mrpl28)
NM_027979	CHIT1	Mus musculus	chitinase 1 (chitotriosidase)(Chit1)
NM_175662	HIST2H2AC	Mus musculus	histone cluster 2, H2ac(Hist2h2ac)
NM_175661	Hist1h2af	Mus musculus	histone cluster 1, H2af(Hist1h2af)
NM_172275	TRAFD1	Mus musculus	TRAF type zinc finger domain containing 1(Trafd1)
NM_025313	ATP5D	Mus musculus	ATP synthase, H+ transporting, mitochondrial F1 complex, delta subunit(Atp5d)
NM_026524	MID1IP1	Mus musculus	Mid1 interacting protein 1 (gastrulation specific G12-like (zebrafish))(Mid1ip1)
NM_175666	Hist2h2bb	Mus musculus	histone cluster 2, H2bb(Hist2h2bb)
NM_026763	Col6a4	Mus musculus	collagen, type VI, alpha 4(Col6a4)
NM_027852	RARRES2	Mus musculus	retinoic acid receptor responder (tazarotene induced) 2(Rarres2)
NM_011273	XPR1	Mus musculus	xenotropic and polytropic retrovirus receptor 1(Xpr1)
NM_175425	C1QTNF7	Mus musculus	C1q and tumor necrosis factor related protein 7(C1qtnf7)
NM_027739	B4GALNT1	Mus musculus	beta-1,4-N-acetyl-galactosaminyl transferase 1(B4galnt1)
NM_001177956	GPM6B	Mus musculus	glycoprotein m6b(Gpm6b)
NM_009073	ROM1	Mus musculus	rod outer segment membrane protein 1(Rom1)
NM_026651	POMGNT1	Mus musculus	protein O-linked mannose beta 1,2-N-acetylglucosaminyltransferase(Pomgnt1)
NM_001130184	JADE1	Mus musculus	jade family PHD finger 1(Jade1)
NM_001172147	RBM41	Mus musculus	RNA binding motif protein 41(Rbm41)
NM_001130186	JADE1	Mus musculus	jade family PHD finger 1(Jade1)
NM_016715	CRLF2	Mus musculus	cytokine receptor-like factor 2(Crlf2)
NM_001004156	PLEKHG5	Mus musculus	pleckstrin homology domain containing, family G (with RhoGef domain) member 5(Plekhg5)
NM_027748	TAF3	Mus musculus	TATA-box binding protein associated factor 3(Taf3)
NM_026539	CHD1L	Mus musculus	chromodomain helicase DNA binding protein 1-like(Chd1l)
NM_025326	TMEM176A	Mus musculus	transmembrane protein 176A(Tmem176a)
NM_025327	KRTCAP2	Mus musculus	keratinocyte associated protein 2(Krtcap2)
NM_025448	SSR2	Mus musculus	signal sequence receptor, beta(Ssr2)
NM_147088	OLFR569	Mus musculus	olfactory receptor 569(Olfr569)
NM_001190914	KIRREL3	Mus musculus	kin of IRRE like 3 (Drosophila)(Kirrel3)
NM_001025430	SPAG9	Mus musculus	sperm associated antigen 9(Spag9)
NM_001110201	YIF1B	Mus musculus	Yip1 interacting factor homolog B (S. cerevisiae)(Yif1b)
NM_025325	HAAO	Mus musculus	3-hydroxyanthranilate 3,4-dioxygenase(Haao)
NM_026535	SERPINA12	Mus musculus	serine (or cysteine) peptidase inhibitor, clade A (alpha-1 antiproteinase, antitrypsin), member 12(Serpina12)
NM_023268	qsox1	Mus musculus	quiescin Q6 sulfhydryl oxidase 1(Qsox1)
NM_178700	GRSF1	Mus musculus	G-rich RNA sequence binding factor 1(Grsf1)
NM_015740	BLOC1S1	Mus musculus	biogenesis of lysosomal organelles complex-1, subunit 1(Bloc1s1)
NM_001122668	E330014E10Rik	Mus musculus	RIKEN cDNA E330014E10 gene(E330014E10Rik)
NM_153506	Clec2e	Mus musculus	C-type lectin domain family 2, member e(Clec2e)
NM_010292	GCK	Mus musculus	glucokinase(Gck)
NM_153508	clstn3	Mus musculus	calsyntenin 3(Clstn3)
NM_183296	Krtap16-3	Mus musculus	keratin associated protein 16-3(Krtap16-3)
NM_001177967	LCLAT1	Mus musculus	lysocardiolipin acyltransferase 1(Lclat1)
NM_011379	SIPA1	Mus musculus	signal-induced proliferation associated gene 1(Sipa1)
NM_001195497	DCLK2	Mus musculus	doublecortin-like kinase 2(Dclk2)
NM_001164184	LSR	Mus musculus	lipolysis stimulated lipoprotein receptor(Lsr)
NM_026300	4930549C01Rik	Mus musculus	RIKEN cDNA 4930549C01 gene(4930549C01Rik)
NM_023154	ETHE1	Mus musculus	ethylmalonic encephalopathy 1(Ethe1)
NM_001195258	Tgfbr3l	Mus musculus	transforming growth factor, beta receptor III-like(Tgfbr3l)
NM_009181	ST8SIA2	Mus musculus	ST8 alpha-N-acetyl-neuraminide alpha-2,8-sialyltransferase 2(St8sia2)
NM_001172157	DIS3L2	Mus musculus	DIS3 like 3'-5' exoribonuclease 2(Dis3l2)
NM_009063	RGS5	Mus musculus	regulator of G-protein signaling 5(Rgs5)
NM_001004145	Nlrp4g	Mus musculus	NLR family, pyrin domain containing 4G(Nlrp4g)
NM_007906	EEF1A2	Mus musculus	eukaryotic translation elongation factor 1 alpha 2(Eef1a2)
NM_026988	PTMS	Mus musculus	parathymosin(Ptms)
NM_009091	RPS15	Mus musculus	ribosomal protein S15(Rps15)
NM_001025561	PUS1	Mus musculus	pseudouridine synthase 1(Pus1)
NM_025897	RRP8	Mus musculus	ribosomal RNA processing 8, methyltransferase, homolog (yeast)(Rrp8)
NM_175641	LTBP4	Mus musculus	latent transforming growth factor beta binding protein 4(Ltbp4)
NM_026741	Zfp579	Mus musculus	zinc finger protein 579(Zfp579)
NM_183148	IFFO2	Mus musculus	intermediate filament family orphan 2(Iffo2)
NM_001166594	EIF5A	Mus musculus	eukaryotic translation initiation factor 5A(Eif5a)
NM_001035122	GOLM1	Mus musculus	golgi membrane protein 1(Golm1)
NM_011052	PDCD6IP	Mus musculus	programmed cell death 6 interacting protein(Pdcd6ip)
NM_001168652	lrch4	Mus musculus	leucine-rich repeats and calponin homology (CH) domain containing 4(Lrch4)
NM_001039720	9030619P08Rik	Mus musculus	lymphocyte antigen 6 complex pseudogene(9030619P08Rik)
NM_011170	PRNP	Mus musculus	prion protein(Prnp)
NM_153414	INTS9	Mus musculus	integrator complex subunit 9(Ints9)
NM_033041	HES7	Mus musculus	hairy and enhancer of split 7 (Drosophila)(Hes7)
NM_178916	RFESD	Mus musculus	Rieske (Fe-S) domain containing(Rfesd)
NM_001025208	LOC547349	Mus musculus	MHC class I family member(LOC547349)
NM_001164051	PIK3CD	Mus musculus	phosphatidylinositol 3-kinase catalytic delta polypeptide(Pik3cd)
NM_001034031	IL17RE	Mus musculus	interleukin 17 receptor E(Il17re)
NM_011166	Prl6a1	Mus musculus	prolactin family 6, subfamily a, member 1(Prl6a1)
NM_001195048	PAK3	Mus musculus	p21 protein (Cdc42/Rac)-activated kinase 3(Pak3)
NM_133933	RPN1	Mus musculus	ribophorin I(Rpn1)
NM_172381	AI314180	Mus musculus	expressed sequence AI314180(AI314180)
NM_175652	HIST4H4	Mus musculus	histone cluster 4, H4(Hist4h4)
NM_023125	kng1	Mus musculus	kininogen 1(Kng1)
NM_172145	EVA1B	Mus musculus	eva-1 homolog B (C. elegans)(Eva1b)
NM_001025571	SH2D2A	Mus musculus	SH2 domain containing 2A(Sh2d2a)
NM_011164	PRL	Mus musculus	prolactin(Prl)
NM_175659	hist1h2ah	Mus musculus	histone cluster 1, H2ah(Hist1h2ah)
NM_029901	Akr1c21	Mus musculus	aldo-keto reductase family 1, member C21(Akr1c21)
NM_001164045	Ccl27a	Mus musculus	chemokine (C-C motif) ligand 27A(Ccl27a)
NM_001164046	Gm13306	Mus musculus	predicted gene 13306(Gm13306)
NM_177719	Morc2b	Mus musculus	microrchidia 2B(Morc2b)
NM_001166580	8430408G22Rik	Mus musculus	RIKEN cDNA 8430408G22 gene(8430408G22Rik)
NM_010068	DNMT3B	Mus musculus	DNA methyltransferase 3B(Dnmt3b)
NM_001164040	LY6E	Mus musculus	lymphocyte antigen 6 complex, locus E(Ly6e)
NM_028940	CLVS1	Mus musculus	clavesin 1(Clvs1)
NM_001177980	PDE4B	Mus musculus	phosphodiesterase 4B, cAMP specific(Pde4b)
NM_016966	PHGDH	Mus musculus	3-phosphoglycerate dehydrogenase(Phgdh)
NM_001005225	Olfr1197	Mus musculus	olfactory receptor 1197(Olfr1197)
NM_001164039	LY6E	Mus musculus	lymphocyte antigen 6 complex, locus E(Ly6e)
NM_001039509	pnkd	Mus musculus	paroxysmal nonkinesiogenic dyskinesia(Pnkd)
NM_001081049	KMT2A	Mus musculus	lysine (K)-specific methyltransferase 2A(Kmt2a)
NM_001025584	KCNJ6	Mus musculus	potassium inwardly-rectifying channel, subfamily J, member 6(Kcnj6)
NM_176832	SPIRE1	Mus musculus	spire homolog 1 (Drosophila)(Spire1)
NM_026601	HYI	Mus musculus	hydroxypyruvate isomerase (putative)(Hyi)
NM_177921	Pih1h3b	Mus musculus	PIH1 domain containing 3B(Pih1h3b)
NM_027810	BBS7	Mus musculus	Bardet-Biedl syndrome 7 (human)(Bbs7)
NM_147034	Olfr713	Mus musculus	olfactory receptor 713(Olfr713)
NM_001122756	CORIN	Mus musculus	corin(Corin)
NM_183368	SYTL3	Mus musculus	synaptotagmin-like 3(Sytl3)
NM_001081166	PHF21B	Mus musculus	PHD finger protein 21B(Phf21b)
NM_011593	TIMP1	Mus musculus	tissue inhibitor of metalloproteinase 1(Timp1)
NM_010380	H2-D1	Mus musculus	histocompatibility 2, D region locus 1(H2-D1)
NM_001198570	ABI2	Mus musculus	abl-interactor 2(Abi2)
NM_001081280	NLRC3	Mus musculus	NLR family, CARD domain containing 3(Nlrc3)
NM_173449	PP2D1	Mus musculus	protein phosphatase 2C-like domain containing 1(Pp2d1)
NM_001105187	Vmn2r74	Mus musculus	vomeronasal 2, receptor 74(Vmn2r74)
NM_146061	PRR5	Mus musculus	proline rich 5 (renal)(Prr5)
NM_009158	MAPK10	Mus musculus	mitogen-activated protein kinase 10(Mapk10)
NM_011106	PKIG	Mus musculus	protein kinase inhibitor, gamma(Pkig)
NM_008189	GUCA1A	Mus musculus	guanylate cyclase activator 1a (retina)(Guca1a)
NM_054079	Iltifb	Mus musculus	interleukin 10-related T cell-derived inducible factor beta(Iltifb)
NM_010255	GAMT	Mus musculus	guanidinoacetate methyltransferase(Gamt)
NM_134087	fam83h	Mus musculus	family with sequence similarity 83, member H(Fam83h)
NM_013641	PTGER1	Mus musculus	prostaglandin E receptor 1 (subtype EP1)(Ptger1)
NM_001177630	ETL4	Mus musculus	enhancer trap locus 4(Etl4)
NM_025880	2410002F23Rik	Mus musculus	RIKEN cDNA 2410002F23 gene(2410002F23Rik)
NM_008185	GstT1	Mus musculus	glutathione S-transferase, theta 1(Gstt1)
NM_001164149	TCF3	Mus musculus	transcription factor 3(Tcf3)
NM_001122989	CDC14B	Mus musculus	CDC14 cell division cycle 14B(Cdc14b)
NM_022014	FN3K	Mus musculus	fructosamine 3 kinase(Fn3k)
NM_001168624	C2CD4C	Mus musculus	C2 calcium-dependent domain containing 4C(C2cd4c)
NM_053098	LMOD2	Mus musculus	leiomodin 2 (cardiac)(Lmod2)
NM_027706	NBAS	Mus musculus	neuroblastoma amplified sequence(Nbas)
NM_010248	GAB2	Mus musculus	growth factor receptor bound protein 2-associated protein 2(Gab2)
NM_001098837	ATXN7L3	Mus musculus	ataxin 7-like 3(Atxn7l3)
NM_016906	SEC61A1	Mus musculus	Sec61 alpha 1 subunit (S. cerevisiae)(Sec61a1)
NM_011697	VEGFB	Mus musculus	vascular endothelial growth factor B(Vegfb)
NM_013633	POU5F1	Mus musculus	POU domain, class 5, transcription factor 1(Pou5f1)
NM_001198561	H2-Q7	Mus musculus	histocompatibility 2, Q region locus 7(H2-Q7)
NM_026982	TMEM256	Mus musculus	transmembrane protein 256(Tmem256)
NM_198622	H1FX	Mus musculus	H1 histone family, member X(H1fx)
NM_010129	EMP3	Mus musculus	epithelial membrane protein 3(Emp3)
NM_008173	NR3C1	Mus musculus	nuclear receptor subfamily 3, group C, member 1(Nr3c1)
NM_009381	THRSP	Mus musculus	thyroid hormone responsive(Thrsp)
NM_207162	Gm20738	Mus musculus	predicted gene, 20738(Gm20738)
NM_027912	TYSND1	Mus musculus	trypsin domain containing 1(Tysnd1)
NM_026822	LCE1B	Mus musculus	late cornified envelope 1B(Lce1b)
NM_026943	SNRPD2	Mus musculus	small nuclear ribonucleoprotein D2(Snrpd2)
NM_001081268	PRSS53	Mus musculus	protease, serine 53(Prss53)
NM_025852	REXO1	Mus musculus	REX1, RNA exonuclease 1(Rexo1)
NM_001083322	KLRK1	Mus musculus	killer cell lectin-like receptor subfamily K, member 1(Klrk1)
NM_172454	PANX3	Mus musculus	pannexin 3(Panx3)
NM_011252	RBMX	Mus musculus	RNA binding motif protein, X chromosome(Rbmx)
NM_174996	SZRD1	Mus musculus	SUZ RNA binding domain containing 1(Szrd1)
NM_001109688	C2CD5	Mus musculus	C2 calcium-dependent domain containing 5(C2cd5)
NM_027918	1300017J02Rik	Mus musculus	RIKEN cDNA 1300017J02 gene(1300017J02Rik)
NM_025739	RNF220	Mus musculus	ring finger protein 220(Rnf220)
NM_025858	SHISA5	Mus musculus	shisa family member 5(Shisa5)
NM_001097617	C1s1	Mus musculus	complement component 1, s subcomponent 1(C1s1)
NM_009058	RALGDS	Mus musculus	ral guanine nucleotide dissociation stimulator(Ralgds)
NM_008088	GAS7	Mus musculus	growth arrest specific 7(Gas7)
NM_010274	GPD2	Mus musculus	glycerol phosphate dehydrogenase 2, mitochondrial(Gpd2)
NM_138586	EXOSC5	Mus musculus	exosome component 5(Exosc5)
NM_001085516	Gm12794	Mus musculus	predicted gene 12794(Gm12794)
NM_008084	GAPDH	Mus musculus	glyceraldehyde-3-phosphate dehydrogenase(Gapdh)
NM_013549	Hist2h2aa1	Mus musculus	histone cluster 2, H2aa1(Hist2h2aa1)
NM_023326	Bmyc	Mus musculus	brain expressed myelocytomatosis oncogene(Bmyc)
NM_025983	ATP5E	Mus musculus	ATP synthase, H+ transporting, mitochondrial F1 complex, epsilon subunit(Atp5e)
NM_001185164	VEGFB	Mus musculus	vascular endothelial growth factor B(Vegfb)
NM_001081032	Gm8909	Mus musculus	predicted gene 8909(Gm8909)
NM_177914	DGKK	Mus musculus	diacylglycerol kinase kappa(Dgkk)
NM_010394	H2-Q7	Mus musculus	histocompatibility 2, Q region locus 7(H2-Q7)
NM_001163394	EVL	Mus musculus	Ena-vasodilator stimulated phosphoprotein(Evl)
NM_011480	SREBF1	Mus musculus	sterol regulatory element binding transcription factor 1(Srebf1)
NM_010392	H2-Q2	Mus musculus	histocompatibility 2, Q region locus 2(H2-Q2)
NM_001017525	BTBD11	Mus musculus	BTB (POZ) domain containing 11(Btbd11)
NM_078477	KLF16	Mus musculus	Kruppel-like factor 16(Klf16)
NM_001163399	ELAVL4	Mus musculus	ELAV (embryonic lethal, abnormal vision, Drosophila)-like 4 (Hu antigen D)(Elavl4)
NM_026838	SRPX2	Mus musculus	sushi-repeat-containing protein, X-linked 2(Srpx2)
NM_146094	FADS1	Mus musculus	fatty acid desaturase 1(Fads1)
NM_008199	H2-Bl	Mus musculus	histocompatibility 2, blastocyst(H2-Bl)
NM_010388	H2-DMb2	Mus musculus	histocompatibility 2, class II, locus Mb2(H2-DMb2)
NM_010386	H2-DMa	Mus musculus	histocompatibility 2, class II, locus DMa(H2-DMa)
NM_198605	SKA3	Mus musculus	spindle and kinetochore associated complex subunit 3(Ska3)
NM_010264	NR6A1	Mus musculus	nuclear receptor subfamily 6, group A, member 1(Nr6a1)
NM_009283	STAT1	Mus musculus	signal transducer and activator of transcription 1(Stat1)
NM_001177787	CD44	Mus musculus	CD44 antigen(Cd44)
NM_016925	FANCA	Mus musculus	Fanconi anemia, complementation group A(Fanca)
NM_022323	MOAP1	Mus musculus	modulator of apoptosis 1(Moap1)
NM_147112	Olfr559	Mus musculus	olfactory receptor 559(Olfr559)
NM_174851	IFNLR1	Mus musculus	interferon lambda receptor 1(Ifnlr1)
NM_152947	OVOL2	Mus musculus	ovo like zinc finger 2(Ovol2)
NM_134037	ACLY	Mus musculus	ATP citrate lyase(Acly)
NM_134038	SLC16A6	Mus musculus	solute carrier family 16 (monocarboxylic acid transporters), member 6(Slc16a6)
NM_033582	PCDHGC4	Mus musculus	protocadherin gamma subfamily C, 4(Pcdhgc4)
NM_146020	GLTPD2	Mus musculus	glycolipid transfer protein domain containing 2(Gltpd2)
NM_173408	DCUN1D3	Mus musculus	DCN1, defective in cullin neddylation 1, domain containing 3 (S. cerevisiae)(Dcun1d3)
NM_001163389	SNX11	Mus musculus	sorting nexin 11(Snx11)
NM_010699	LDHA	Mus musculus	lactate dehydrogenase A(Ldha)
NM_008265	HOXA4	Mus musculus	homeobox A4(Hoxa4)
NM_001109748	TOMM40	Mus musculus	translocase of outer mitochondrial membrane 40 homolog (yeast)(Tomm40)
NM_054039	FOXP3	Mus musculus	forkhead box P3(Foxp3)
NM_001048148	ZGPAT	Mus musculus	zinc finger, CCCH-type with G patch domain(Zgpat)
NM_133190	CACNG8	Mus musculus	calcium channel, voltage-dependent, gamma subunit 8(Cacng8)
NM_023547	INO80B	Mus musculus	INO80 complex subunit B(Ino80b)
NM_021489	F12	Mus musculus	coagulation factor XII (Hageman factor)(F12)
NM_172445	WDR37	Mus musculus	WD repeat domain 37(Wdr37)
NM_173415	NYX	Mus musculus	nyctalopin(Nyx)
NM_001127188	Zfp534	Mus musculus	zinc finger protein 534(Zfp534)
NM_001017983	FOXRED2	Mus musculus	FAD-dependent oxidoreductase domain containing 2(Foxred2)
NM_001195096	PHACTR2	Mus musculus	phosphatase and actin regulator 2(Phactr2)
NM_011533	TBX10	Mus musculus	T-box 10(Tbx10)
NM_008138	GNAI2	Mus musculus	guanine nucleotide binding protein (G protein), alpha inhibiting 2(Gnai2)
NM_001199696	ADGRB2	Mus musculus	adhesion G protein-coupled receptor B2(Adgrb2)
NM_010440	HMG20B	Mus musculus	high mobility group 20B(Hmg20b)
NM_001042715	DRC7	Mus musculus	dynein regulatory complex subunit 7(Drc7)
NM_001114085	NDE1	Mus musculus	nudE neurodevelopment protein 1(Nde1)
NM_013839	NR1H3	Mus musculus	nuclear receptor subfamily 1, group H, member 3(Nr1h3)
NM_147118	Olfr635	Mus musculus	olfactory receptor 635(Olfr635)
NM_011659	TNFRSF4	Mus musculus	tumor necrosis factor receptor superfamily, member 4(Tnfrsf4)
NM_010206	FGFR1	Mus musculus	fibroblast growth factor receptor 1(Fgfr1)
NM_170590	CPNE1	Mus musculus	copine I(Cpne1)
NM_001114087	PDLIM7	Mus musculus	PDZ and LIM domain 7(Pdlim7)
NM_001166635	MID1IP1	Mus musculus	Mid1 interacting protein 1 (gastrulation specific G12-like (zebrafish))(Mid1ip1)
NM_021456	Ces1g	Mus musculus	carboxylesterase 1G(Ces1g)
NM_173862	FAM83A	Mus musculus	family with sequence similarity 83, member A(Fam83a)
NM_026909	thap7	Mus musculus	THAP domain containing 7(Thap7)
NM_138655	TMC2	Mus musculus	transmembrane channel-like gene family 2(Tmc2)
NM_010240	Ftl1	Mus musculus	ferritin light polypeptide 1(Ftl1)
NM_207525	OPA3	Mus musculus	optic atrophy 3(Opa3)
NM_001039566	Defb30	Mus musculus	defensin beta 30(Defb30)
NM_001164575	Zfp169	Mus musculus	zinc finger protein 169(Zfp169)
NM_010114	Klk1b22	Mus musculus	kallikrein 1-related peptidase b22(Klk1b22)
NM_013746	PLEKHB1	Mus musculus	pleckstrin homology domain containing, family B (evectins) member 1(Plekhb1)
NM_080463	POFUT1	Mus musculus	protein O-fucosyltransferase 1(Pofut1)
NM_001040684	HSD3B7	Mus musculus	hydroxy-delta-5-steroid dehydrogenase, 3 beta- and steroid delta-isomerase 7(Hsd3b7)
NM_013502	CTBP1	Mus musculus	C-terminal binding protein 1(Ctbp1)
NM_010237	FRK	Mus musculus	fyn-related kinase(Frk)
NM_010595	KCNA1	Mus musculus	potassium voltage-gated channel, shaker-related subfamily, member 1(Kcna1)
NM_011563	PRDX2	Mus musculus	peroxiredoxin 2(Prdx2)
NM_207636	FNDC3A	Mus musculus	fibronectin type III domain containing 3A(Fndc3a)
NM_015809	KRTAP5-4	Mus musculus	keratin associated protein 5-4(Krtap5-4)
NM_031255	RSPH6A	Mus musculus	radial spoke head 6 homolog A (Chlamydomonas)(Rsph6a)
NM_013860	LIMD1	Mus musculus	LIM domains containing 1(Limd1)
NM_008160	GPX1	Mus musculus	glutathione peroxidase 1(Gpx1)
NM_001130444	HRAS	Mus musculus	Harvey rat sarcoma virus oncogene(Hras)
NM_001040686	Zfp692	Mus musculus	zinc finger protein 692(Zfp692)
NM_001177699	ABLIM2	Mus musculus	actin-binding LIM protein 2(Ablim2)
NM_001029889	USF3	Mus musculus	upstream transcription factor family member 3(Usf3)
NM_001164568	SIPA1	Mus musculus	signal-induced proliferation associated gene 1(Sipa1)
NM_021347	GSDMA	Mus musculus	gasdermin A(Gsdma)
NM_020012	RNF14	Mus musculus	ring finger protein 14(Rnf14)
NM_001013369	PFDN4	Mus musculus	prefoldin 4(Pfdn4)
NM_175933	PEX5	Mus musculus	peroxisomal biogenesis factor 5(Pex5)
NM_001109993	tmem141	Mus musculus	transmembrane protein 141(Tmem141)
NM_001163353	Gm12171	Mus musculus	predicted gene 12171(Gm12171)
NM_172669	AMBRA1	Mus musculus	autophagy/beclin 1 regulator 1(Ambra1)
NM_001081072	SLC27A6	Mus musculus	solute carrier family 27 (fatty acid transporter), member 6(Slc27a6)
NM_031390	Pramel3	Mus musculus	preferentially expressed antigen in melanoma-like 3(Pramel3)
NM_001166743	Vmn1r117	Mus musculus	vomeronasal 1 receptor 117(Vmn1r117)
NM_001199115	SLC29A1	Mus musculus	solute carrier family 29 (nucleoside transporters), member 1(Slc29a1)
NM_010468	HOXD3	Mus musculus	homeobox D3(Hoxd3)
NM_010223	FKBP8	Mus musculus	FK506 binding protein 8(Fkbp8)
NM_152839	JCHAIN	Mus musculus	immunoglobulin joining chain(Jchain)
NM_010343	GPX5	Mus musculus	glutathione peroxidase 5(Gpx5)
NM_207648	H2-Q6	Mus musculus	histocompatibility 2, Q region locus 6(H2-Q6)
NM_001199113	SLC29A1	Mus musculus	solute carrier family 29 (nucleoside transporters), member 1(Slc29a1)
NM_207649	RCAN2	Mus musculus	regulator of calcineurin 2(Rcan2)
NM_009127	Scd1	Mus musculus	stearoyl-Coenzyme A desaturase 1(Scd1)
NM_194446	CDK10	Mus musculus	cyclin-dependent kinase 10(Cdk10)
NM_008158	GPR27	Mus musculus	G protein-coupled receptor 27(Gpr27)
NM_009242	SPARC	Mus musculus	secreted acidic cysteine rich glycoprotein(Sparc)
NM_001042613	sepp1	Mus musculus	selenoprotein P, plasma, 1(Sepp1)
NM_010108	EFNA3	Mus musculus	ephrin A3(Efna3)
NM_013615	ODF2	Mus musculus	outer dense fiber of sperm tails 2(Odf2)
NM_001164677	PDCD6IP	Mus musculus	programmed cell death 6 interacting protein(Pdcd6ip)
NM_001164678	PDCD6IP	Mus musculus	programmed cell death 6 interacting protein(Pdcd6ip)
NM_019476	Olfr159	Mus musculus	olfactory receptor 159(Olfr159)
NM_001190327	TMSB10	Mus musculus	thymosin, beta 10(Tmsb10)
NM_001162493	MPST	Mus musculus	mercaptopyruvate sulfurtransferase(Mpst)
NM_001099779	PKLR	Mus musculus	pyruvate kinase liver and red blood cell(Pklr)
NM_001163462	RPAP2	Mus musculus	RNA polymerase II associated protein 2(Rpap2)
NM_134239	Vmn1r217	Mus musculus	vomeronasal 1 receptor 217(Vmn1r217)
NM_053272	DHCR24	Mus musculus	24-dehydrocholesterol reductase(Dhcr24)
NM_029285	1700001C02Rik	Mus musculus	RIKEN cDNA 1700001C02 gene(1700001C02Rik)
NM_009315	TAF6	Mus musculus	TATA-box binding protein associated factor 6(Taf6)
NM_030261	SESN3	Mus musculus	sestrin 3(Sesn3)
NM_001085376	PAPPA2	Mus musculus	pappalysin 2(Pappa2)
NM_007377	AATK	Mus musculus	apoptosis-associated tyrosine kinase(Aatk)
NM_001005859	RPL34	Mus musculus	ribosomal protein L34(Rpl34)
NM_178184	Hist1h2an	Mus musculus	histone cluster 1, H2an(Hist1h2an)
NM_013809	CYP2G1	Mus musculus	cytochrome P450, family 2, subfamily g, polypeptide 1(Cyp2g1)
NM_009790	CALM1	Mus musculus	calmodulin 1(Calm1)
NM_178183	Hist1h2ak	Mus musculus	histone cluster 1, H2ak(Hist1h2ak)
NM_001177595	SLC8B1	Mus musculus	solute carrier family 8 (sodium/lithium/calcium exchanger), member B1(Slc8b1)
NM_009791	ASPM	Mus musculus	asp (abnormal spindle)-like, microcephaly associated (Drosophila)(Aspm)
NM_178182	Hist1h2ai	Mus musculus	histone cluster 1, H2ai(Hist1h2ai)
NM_170680	ABCC10	Mus musculus	ATP-binding cassette, sub-family C (CFTR/MRP), member 10(Abcc10)
NM_007493	ASGR2	Mus musculus	asialoglycoprotein receptor 2(Asgr2)
NM_178188	HIST1H2AD	Mus musculus	histone cluster 1, H2ad(Hist1h2ad)
NM_178185	Hist1h2ap	Mus musculus	histone cluster 1, H2ap(Hist1h2ap)
NM_001162366	PTK2B	Mus musculus	PTK2 protein tyrosine kinase 2 beta(Ptk2b)
NM_022411	SLC13A2	Mus musculus	solute carrier family 13 (sodium-dependent dicarboxylate transporter), member 2(Slc13a2)
NM_001162365	PTK2B	Mus musculus	PTK2 protein tyrosine kinase 2 beta(Ptk2b)
NM_001166725	Vmn1r129	Mus musculus	vomeronasal 1 receptor 129(Vmn1r129)
NM_020594	ZC3H8	Mus musculus	zinc finger CCCH type containing 8(Zc3h8)
NM_134002	CSNK1G2	Mus musculus	casein kinase 1, gamma 2(Csnk1g2)
NM_134245	Vmn1r216	Mus musculus	vomeronasal 1 receptor 216(Vmn1r216)
NM_138721	LSM10	Mus musculus	U7 snRNP-specific Sm-like protein LSM10(Lsm10)
NM_138601	D10Jhu81e	Mus musculus	DNA segment, Chr 10, Johns Hopkins University 81 expressed(D10Jhu81e)
NM_001163452	TRPC4AP	Mus musculus	transient receptor potential cation channel, subfamily C, member 4 associated protein(Trpc4ap)
NM_134127	Cyp4f15	Mus musculus	cytochrome P450, family 4, subfamily f, polypeptide 15(Cyp4f15)
NM_001164420	PQLC1	Mus musculus	PQ loop repeat containing 1(Pqlc1)
NM_053252	EHBP1L1	Mus musculus	EH domain binding protein 1-like 1(Ehbp1l1)
NM_134009	NCLN	Mus musculus	nicalin(Ncln)
NM_009419	TPST2	Mus musculus	protein-tyrosine sulfotransferase 2(Tpst2)
NM_001163576	PARP10	Mus musculus	poly (ADP-ribose) polymerase family, member 10(Parp10)
NM_022417	ITM2C	Mus musculus	integral membrane protein 2C(Itm2c)
NM_001042752	NEO1	Mus musculus	neogenin(Neo1)
NM_011610	TNFRSF1B	Mus musculus	tumor necrosis factor receptor superfamily, member 1b(Tnfrsf1b)
NM_146226	APEH	Mus musculus	acylpeptide hydrolase(Apeh)
NM_134131	TNFAIP8	Mus musculus	tumor necrosis factor, alpha-induced protein 8(Tnfaip8)
NM_001005608	ITGB4	Mus musculus	integrin beta 4(Itgb4)
NM_178195	Hist1h2bf	Mus musculus	histone cluster 1, H2bf(Hist1h2bf)
NM_001048058	RPL38	Mus musculus	ribosomal protein L38(Rpl38)
NM_001160180	TOR1AIP2	Mus musculus	torsin A interacting protein 2(Tor1aip2)
NM_030159	TROAP	Mus musculus	trophinin associated protein(Troap)
NM_028089	Cyp2c55	Mus musculus	cytochrome P450, family 2, subfamily c, polypeptide 55(Cyp2c55)
NM_007480	ARF5	Mus musculus	ADP-ribosylation factor 5(Arf5)
NM_001170851	Klra2	Mus musculus	killer cell lectin-like receptor, subfamily A, member 2(Klra2)
NM_010767	MASP2	Mus musculus	mannan-binding lectin serine peptidase 2(Masp2)
NM_207680	BCL2L11	Mus musculus	BCL2-like 11 (apoptosis facilitator)(Bcl2l11)
NM_181569	NPRL3	Mus musculus	nitrogen permease regulator-like 3(Nprl3)
NM_001110830	RBFOX2	Mus musculus	RNA binding protein, fox-1 homolog (C. elegans) 2(Rbfox2)
NM_134015	FBXW11	Mus musculus	F-box and WD-40 domain protein 11(Fbxw11)
NM_009207	SLC4A2	Mus musculus	solute carrier family 4 (anion exchanger), member 2(Slc4a2)
NM_001127351	SIRT3	Mus musculus	sirtuin 3(Sirt3)
NM_001127233	Trp53	Mus musculus	transformation related protein 53(Trp53)
NM_053243	prss1	Mus musculus	protease, serine 1 (trypsin 1)(Prss1)
NM_001164532	CPSF4L	Mus musculus	cleavage and polyadenylation specific factor 4-like(Cpsf4l)
NM_008124	GJB1	Mus musculus	gap junction protein, beta 1(Gjb1)
NM_029264	TTLL10	Mus musculus	tubulin tyrosine ligase-like family, member 10(Ttll10)
NM_032540	KEL	Mus musculus	Kell blood group(Kel)
NM_009699	AQP2	Mus musculus	aquaporin 2(Aqp2)
NM_013821	Hsd3b6	Mus musculus	hydroxy-delta-5-steroid dehydrogenase, 3 beta- and steroid delta-isomerase 6(Hsd3b6)
NM_028050	LMNTD2	Mus musculus	lamin tail domain containing 2(Lmntd2)
NM_028291	PAN3	Mus musculus	PAN3 poly(A) specific ribonuclease subunit(Pan3)
NM_011882	RNASEL	Mus musculus	ribonuclease L (2', 5'-oligoisoadenylate synthetase-dependent)(Rnasel)
NM_152806	DDX17	Mus musculus	DEAD (Asp-Glu-Ala-Asp) box polypeptide 17(Ddx17)
NM_134021	PNPO	Mus musculus	pyridoxine 5'-phosphate oxidase(Pnpo)
NM_008369	IL3RA	Mus musculus	interleukin 3 receptor, alpha chain(Il3ra)
NM_001199047	TUBD1	Mus musculus	tubulin, delta 1(Tubd1)
NM_001039123	Defb18	Mus musculus	defensin beta 18(Defb18)
NM_029269	SPP2	Mus musculus	secreted phosphoprotein 2(Spp2)
NM_001039244	TMEM267	Mus musculus	transmembrane protein 267(Tmem267)
NM_009691	APLP2	Mus musculus	amyloid beta (A4) precursor-like protein 2(Aplp2)
NM_001170743	WDR59	Mus musculus	WD repeat domain 59(Wdr59)
NM_028179	2200002D01Rik	Mus musculus	RIKEN cDNA 2200002D01 gene(2200002D01Rik)
NM_021421	ANGEL2	Mus musculus	angel homolog 2 (Drosophila)(Angel2)
NM_001033713	MEF2A	Mus musculus	myocyte enhancer factor 2A(Mef2a)
NM_001012236	TREX1	Mus musculus	three prime repair exonuclease 1(Trex1)
NM_001110824	FOXP4	Mus musculus	forkhead box P4(Foxp4)
NM_001110825	FOXP4	Mus musculus	forkhead box P4(Foxp4)
NM_172989	LPAR1	Mus musculus	lysophosphatidic acid receptor 1(Lpar1)
NM_021548	ARPP19	Mus musculus	cAMP-regulated phosphoprotein 19(Arpp19)
NM_011997	CASP8AP2	Mus musculus	caspase 8 associated protein 2(Casp8ap2)
NM_009446	Tuba3a	Mus musculus	tubulin, alpha 3A(Tuba3a)
NM_028061	CYB561D1	Mus musculus	cytochrome b-561 domain containing 1(Cyb561d1)
NM_001042650	DCUN1D2	Mus musculus	DCN1, defective in cullin neddylation 1, domain containing 2 (S. cerevisiae)(Dcun1d2)
NM_007384	ASIC2	Mus musculus	acid-sensing (proton-gated) ion channel 2(Asic2)
NM_001177389	4933403O08Rik	Mus musculus	RIKEN cDNA 4933403O08 gene(4933403O08Rik)
NM_011632	TRAF3	Mus musculus	TNF receptor-associated factor 3(Traf3)
NM_001042651	DCUN1D2	Mus musculus	DCN1, defective in cullin neddylation 1, domain containing 2 (S. cerevisiae)(Dcun1d2)
NM_009320	SLC6A6	Mus musculus	solute carrier family 6 (neurotransmitter transporter, taurine), member 6(Slc6a6)
NM_007388	ACP5	Mus musculus	acid phosphatase 5, tartrate resistant(Acp5)
NM_001115151	USPL1	Mus musculus	ubiquitin specific peptidase like 1(Uspl1)
NM_019671	NET1	Mus musculus	neuroepithelial cell transforming gene 1(Net1)
NM_001159289	BCL11A	Mus musculus	B cell CLL/lymphoma 11A (zinc finger protein)(Bcl11a)
NM_001142727	1110065P20Rik	Mus musculus	RIKEN cDNA 1110065P20 gene(1110065P20Rik)
NM_182996	Zfp692	Mus musculus	zinc finger protein 692(Zfp692)
NM_028149	FBXL20	Mus musculus	F-box and leucine-rich repeat protein 20(Fbxl20)
NM_008659	MYO1C	Mus musculus	myosin IC(Myo1c)
NM_133222	ADGRL4	Mus musculus	adhesion G protein-coupled receptor L4(Adgrl4)
NM_201364	BC055324	Mus musculus	cDNA sequence BC055324(BC055324)
NM_001160038	NDUFS1	Mus musculus	NADH dehydrogenase (ubiquinone) Fe-S protein 1(Ndufs1)
NM_001130868	KARS	Mus musculus	lysyl-tRNA synthetase(Kars)
NM_010732	LRRN2	Mus musculus	leucine rich repeat protein 2, neuronal(Lrrn2)
NM_009512	SLC27A5	Mus musculus	solute carrier family 27 (fatty acid transporter), member 5(Slc27a5)
NM_029365	MED25	Mus musculus	mediator complex subunit 25(Med25)
NM_001199188	SNX5	Mus musculus	sorting nexin 5(Snx5)
NM_146655	Olfr441	Mus musculus	olfactory receptor 441(Olfr441)
NM_001199187	ASCC1	Mus musculus	activating signal cointegrator 1 complex subunit 1(Ascc1)
NM_001045959	MINK1	Mus musculus	misshapen-like kinase 1 (zebrafish)(Mink1)
NM_001146085	fbxo34	Mus musculus	F-box protein 34(Fbxo34)
NM_009872	CDK5R2	Mus musculus	cyclin-dependent kinase 5, regulatory subunit 2 (p39)(Cdk5r2)
NM_033610	SNCB	Mus musculus	synuclein, beta(Sncb)
NM_177296	TNPO3	Mus musculus	transportin 3(Tnpo3)
NM_001001454	TTYH1	Mus musculus	tweety family member 1(Ttyh1)
NM_028153	EML2	Mus musculus	echinoderm microtubule associated protein like 2(Eml2)
NM_010855	MYH4	Mus musculus	myosin, heavy polypeptide 4, skeletal muscle(Myh4)
NM_001136057	CPNE6	Mus musculus	copine VI(Cpne6)
NM_019424	HPS1	Mus musculus	Hermansky-Pudlak syndrome 1(Hps1)
NM_029249	PARPBP	Mus musculus	PARP1 binding protein(Parpbp)
NM_146794	Olfr1263	Mus musculus	olfactory receptor 1263(Olfr1263)
NM_021407	Trem3	Mus musculus	triggering receptor expressed on myeloid cells 3(Trem3)
NM_008767	SLC22A18	Mus musculus	solute carrier family 22 (organic cation transporter), member 18(Slc22a18)
NM_009614	ADAM15	Mus musculus	a disintegrin and metallopeptidase domain 15 (metargidin)(Adam15)
NM_008408	STT3A	Mus musculus	STT3, subunit of the oligosaccharyltransferase complex, homolog A (S. cerevisiae)(Stt3a)
NM_011930	CLCN7	Mus musculus	chloride channel, voltage-sensitive 7(Clcn7)
NM_146426	Olfr469	Mus musculus	olfactory receptor 469(Olfr469)
NM_201367	GPR176	Mus musculus	G protein-coupled receptor 176(Gpr176)
NM_009745	BCL7B	Mus musculus	B cell CLL/lymphoma 7B(Bcl7b)
NM_008534	LY9	Mus musculus	lymphocyte antigen 9(Ly9)
NM_153193	HSD3B2	Mus musculus	hydroxy-delta-5-steroid dehydrogenase, 3 beta- and steroid delta-isomerase 2(Hsd3b2)
NM_011935	ESRRG	Mus musculus	estrogen-related receptor gamma(Esrrg)
NM_001163645	OSBPL3	Mus musculus	oxysterol binding protein-like 3(Osbpl3)
NM_001099793	TRMT61A	Mus musculus	tRNA methyltransferase 61A(Trmt61a)
NM_001164735	CRLF2	Mus musculus	cytokine receptor-like factor 2(Crlf2)
NM_001163525	S100A14	Mus musculus	S100 calcium binding protein A14(S100a14)
NM_001163641	SETDB1	Mus musculus	SET domain, bifurcated 1(Setdb1)
NM_007595	CAMK2B	Mus musculus	calcium/calmodulin-dependent protein kinase II, beta(Camk2b)
NM_009777	C1QB	Mus musculus	complement component 1, q subcomponent, beta polypeptide(C1qb)
NM_145468	SKP2	Mus musculus	S-phase kinase-associated protein 2 (p45)(Skp2)
NM_001039169	EIF4E2	Mus musculus	eukaryotic translation initiation factor 4E member 2(Eif4e2)
NM_009532	XRCC1	Mus musculus	X-ray repair complementing defective repair in Chinese hamster cells 1(Xrcc1)
NM_011609	TNFRSF1A	Mus musculus	tumor necrosis factor receptor superfamily, member 1a(Tnfrsf1a)
NM_001165939	TSHB	Mus musculus	thyroid stimulating hormone, beta subunit(Tshb)
NM_010759	MAGEB1	Mus musculus	melanoma antigen, family B, 1(Mageb1)
NM_010637	KLF4	Mus musculus	Kruppel-like factor 4 (gut)(Klf4)
NM_177157	GCHFR	Mus musculus	GTP cyclohydrolase I feedback regulator(Gchfr)
NM_198096	ARAP1	Mus musculus	ArfGAP with RhoGAP domain, ankyrin repeat and PH domain 1(Arap1)
NM_001163513	DLG5	Mus musculus	discs, large homolog 5 (Drosophila)(Dlg5)
NM_019441	PPT2	Mus musculus	palmitoyl-protein thioesterase 2(Ppt2)
NM_001163756	Ces2e	Mus musculus	carboxylesterase 2E(Ces2e)
NM_178365	PACSIN1	Mus musculus	protein kinase C and casein kinase substrate in neurons 1(Pacsin1)
NM_001163757	SKOR1	Mus musculus	SKI family transcriptional corepressor 1(Skor1)
NM_153087	HRH4	Mus musculus	histamine receptor H4(Hrh4)
NM_019447	HGFAC	Mus musculus	hepatocyte growth factor activator(Hgfac)
NM_001163758	SKOR1	Mus musculus	SKI family transcriptional corepressor 1(Skor1)
NM_198092	USP2	Mus musculus	ubiquitin specific peptidase 2(Usp2)
NM_028017	NAPG	Mus musculus	N-ethylmaleimide sensitive fusion protein attachment protein gamma(Napg)
NM_001012434	KCTD14	Mus musculus	potassium channel tetramerisation domain containing 14(Kctd14)
NM_172941	Zkscan17	Mus musculus	zinc finger with KRAB and SCAN domains 17(Zkscan17)
NM_008305	HSPG2	Mus musculus	perlecan (heparan sulfate proteoglycan 2)(Hspg2)
NM_001033875	CTRC	Mus musculus	chymotrypsin C (caldecrin)(Ctrc)
NM_001104582	Vmn2r118	Mus musculus	vomeronasal 2, receptor 118(Vmn2r118)
NM_001034963	sorbs1	Mus musculus	sorbin and SH3 domain containing 1(Sorbs1)
NM_206958	LTBP1	Mus musculus	latent transforming growth factor beta binding protein 1(Ltbp1)
NM_146206	TPCN2	Mus musculus	two pore segment channel 2(Tpcn2)
NM_138951	TTC36	Mus musculus	tetratricopeptide repeat domain 36(Ttc36)
NM_146565	Olfr837	Mus musculus	olfactory receptor 837(Olfr837)
NM_028389	TMEM219	Mus musculus	transmembrane protein 219(Tmem219)
NM_009880	CDX1	Mus musculus	caudal type homeobox 1(Cdx1)
NM_010502	IFNA1	Mus musculus	interferon alpha 1(Ifna1)
NM_001111066	FKBP8	Mus musculus	FK506 binding protein 8(Fkbp8)
NM_001142921	TCF7L2	Mus musculus	transcription factor 7 like 2, T cell specific, HMG box(Tcf7l2)
NM_001034857	Zfp976	Mus musculus	zinc finger protein 976(Zfp976)
NM_001113367	BOLL	Mus musculus	bol, boule-like (Drosophila)(Boll)
NM_001135151	SLC39A14	Mus musculus	solute carrier family 39 (zinc transporter), member 14(Slc39a14)
NM_177129	CNTN2	Mus musculus	contactin 2(Cntn2)
NM_001079883	BCL11B	Mus musculus	B cell leukemia/lymphoma 11B(Bcl11b)
NM_001159483	RPL19	Mus musculus	ribosomal protein L19(Rpl19)
NM_008979	PTPN22	Mus musculus	protein tyrosine phosphatase, non-receptor type 22 (lymphoid)(Ptpn22)
NM_001102471	CNNM2	Mus musculus	cyclin M2(Cnnm2)
NM_029681	WBSCR28	Mus musculus	Williams-Beuren syndrome chromosome region 28 (human)(Wbscr28)
NM_145402	TMEM51	Mus musculus	transmembrane protein 51(Tmem51)
NM_008500	LHX6	Mus musculus	LIM homeobox protein 6(Lhx6)
NM_028236	CEACAM18	Mus musculus	carcinoembryonic antigen-related cell adhesion molecule 18(Ceacam18)
NM_001163619	TARS2	Mus musculus	threonyl-tRNA synthetase 2, mitochondrial (putative)(Tars2)
NM_019987	ICK	Mus musculus	intestinal cell kinase(Ick)
NM_019503	FXYD1	Mus musculus	FXYD domain-containing ion transport regulator 1(Fxyd1)
NM_001003950	RAB3IP	Mus musculus	RAB3A interacting protein(Rab3ip)
NM_001111062	COMT	Mus musculus	catechol-O-methyltransferase(Comt)
NM_001190179	NUP35	Mus musculus	nucleoporin 35(Nup35)
NM_026296	4930548H24Rik	Mus musculus	RIKEN cDNA 4930548H24 gene(4930548H24Rik)
NM_011900	MPDU1	Mus musculus	mannose-P-dolichol utilization defect 1(Mpdu1)
NM_001114322	CDHR5	Mus musculus	cadherin-related family member 5(Cdhr5)
NM_021607	NCSTN	Mus musculus	nicastrin(Ncstn)
NM_001039074	LDB3	Mus musculus	LIM domain binding 3(Ldb3)
NM_029212	CCDC33	Mus musculus	coiled-coil domain containing 33(Ccdc33)
NM_007402	ADAM7	Mus musculus	a disintegrin and metallopeptidase domain 7(Adam7)
NM_007401	ADAM5	Mus musculus	a disintegrin and metallopeptidase domain 5(Adam5)
NM_146500	Olfr319	Mus musculus	olfactory receptor 319(Olfr319)
NM_026187	ANKZF1	Mus musculus	ankyrin repeat and zinc finger domain containing 1(Ankzf1)
NM_001195730	DCDC2B	Mus musculus	doublecortin domain containing 2b(Dcdc2b)
NM_001170694	RCBTB2	Mus musculus	regulator of chromosome condensation (RCC1) and BTB (POZ) domain containing protein 2(Rcbtb2)
NM_026063	UQCC2	Mus musculus	ubiquinol-cytochrome c reductase complex assembly factor 2(Uqcc2)
NM_177466	rab11fip5	Mus musculus	RAB11 family interacting protein 5 (class I)(Rab11fip5)
NM_001033308	THEMIS2	Mus musculus	thymocyte selection associated family member 2(Themis2)
NM_011808	ETS1	Mus musculus	E26 avian leukemia oncogene 1, 5' domain(Ets1)
NM_011809	ETS2	Mus musculus	E26 avian leukemia oncogene 2, 3' domain(Ets2)
NM_133200	P2RY14	Mus musculus	purinergic receptor P2Y, G-protein coupled, 14(P2ry14)
NM_001033421	PATE2	Mus musculus	prostate and testis expressed 2(Pate2)
NM_133687	CXXC5	Mus musculus	CXXC finger 5(Cxxc5)
NM_029419	Apol7a	Mus musculus	apolipoprotein L 7a(Apol7a)
NM_001012640	AY761185	Mus musculus	cDNA sequence AY761185(AY761185)
NM_148937	PLCD4	Mus musculus	phospholipase C, delta 4(Plcd4)
NM_146514	Olfr96	Mus musculus	olfactory receptor 96(Olfr96)
NM_007550	BLM	Mus musculus	Bloom syndrome, RecQ helicase-like(Blm)
NM_001045530	ccnjl	Mus musculus	cyclin J-like(Ccnjl)
NM_029787	cyb5r3	Mus musculus	cytochrome b5 reductase 3(Cyb5r3)
NM_133693	RBM42	Mus musculus	RNA binding motif protein 42(Rbm42)
NM_019648	METAP2	Mus musculus	methionine aminopeptidase 2(Metap2)
NM_026036	CMTM6	Mus musculus	CKLF-like MARVEL transmembrane domain containing 6(Cmtm6)
NM_001114595	EHBP1L1	Mus musculus	EH domain binding protein 1-like 1(Ehbp1l1)
NM_177231	ARRB1	Mus musculus	arrestin, beta 1(Arrb1)
NM_145428	DHRS7B	Mus musculus	dehydrogenase/reductase (SDR family) member 7B(Dhrs7b)
NM_181856	tmc8	Mus musculus	transmembrane channel-like gene family 8(Tmc8)
NM_001033318	COG7	Mus musculus	component of oligomeric golgi complex 7(Cog7)
NM_198171	Ces2b	Mus musculus	carboxyesterase 2B(Ces2b)
NM_018795	ABCC6	Mus musculus	ATP-binding cassette, sub-family C (CFTR/MRP), member 6(Abcc6)
NM_027249	TLCD2	Mus musculus	TLC domain containing 2(Tlcd2)
NM_008748	DUSP8	Mus musculus	dual specificity phosphatase 8(Dusp8)
NM_007416	ADRA1B	Mus musculus	adrenergic receptor, alpha 1b(Adra1b)
NM_009720	ATOX1	Mus musculus	antioxidant 1 copper chaperone(Atox1)
NM_007783	CSK	Mus musculus	c-src tyrosine kinase(Csk)
NM_009842	CD151	Mus musculus	CD151 antigen(Cd151)
NM_008753	OAZ1	Mus musculus	ornithine decarboxylase antizyme 1(Oaz1)
NM_001160319	UBR4	Mus musculus	ubiquitin protein ligase E3 component n-recognin 4(Ubr4)
NM_007784	CSN1S1	Mus musculus	casein alpha s1(Csn1s1)
NM_019999	pnkd	Mus musculus	paroxysmal nonkinesiogenic dyskinesia(Pnkd)
NM_026161	C1QTNF4	Mus musculus	C1q and tumor necrosis factor related protein 4(C1qtnf4)
NM_181858	Cd59b	Mus musculus	CD59b antigen(Cd59b)
NM_199012	FCHSD2	Mus musculus	FCH and double SH3 domains 2(Fchsd2)
